# Supplementary material for: Preservice teachers’ enactment of formative assessment using rubrics in the inquiry-based chemistry laboratory
Source: Royal Society of Chemistry journal article supplement (doi:10.1039/d1rp00001b), 2021-01-01
Supplement: d1rp00001b3.pdf [file d1rp00001b3.pdf]

### **Appendix C - Rubric for Inquiry-based Chem lab report (level II – partial/complete)<sup>1</sup>**

Experiment name: \_\_\_\_\_

Experiment date: \_\_\_\_\_ Lab report assessment date: \_\_\_\_\_

Students' name: \_\_\_\_\_

#### **Section 1: Getting familiar with a phenomenon (10 points) – choose one dimension**

| Dimension                           | Criteria                                                                                                                 | Assessment | Score |
|-------------------------------------|--------------------------------------------------------------------------------------------------------------------------|------------|-------|
| <b>1.1 - Pre-experiment / video</b> | 1.1.1 - Making detailed observations                                                                                     |            |       |
|                                     | 1.1.2 - Describe observation without interpretation                                                                      |            |       |
|                                     | 1.1.3 - Detailed and reasoned answers to questions                                                                       |            |       |
| <b>1.2 - Scientific article</b>     | 1.2.1 - Answer questions in a comprehensive and reasoned way                                                             |            |       |
|                                     | 1.2.2 - Explanations are given for different levels of understanding using accurate and correct scientific language      |            |       |
|                                     | 1.2.3 - Ask questions whose answers do not appear in the article                                                         |            |       |
|                                     | 1.2.4 - Ask questions which include at least two levels of understanding (macroscopic, microscopic, symbol, and process) |            |       |
| <b>1.3 - Internet research</b>      | 1.3.1 - Finding and selecting relevant databases                                                                         |            |       |
|                                     | 1.3.2 - List the sources of information clearly                                                                          |            |       |
|                                     | 1.3.3 - Finding relevant information for experiment                                                                      |            |       |
|                                     | 1.3.4 - Answer questions in a comprehensive and reasoned way                                                             |            |       |
| <b>1.4 - Educational tour</b>       | 1.4.1 - Answer correctly the preparation questions for the tour                                                          |            |       |
|                                     | 1.4.2 - Perform tasks correctly while on tour                                                                            |            |       |
|                                     | 1.4.3 - Fully perform the recap tasks after the tour                                                                     |            |       |

#### **Section 2: Experiment Planning (40 points):**

| Dimension                                  | Max    | Criteria                                                                                                            | Assessment | Score |
|--------------------------------------------|--------|---------------------------------------------------------------------------------------------------------------------|------------|-------|
| <b>2.1 - Asking research questions</b>     | 5 pts  | 2.1.1 - Asking a variety of relevant questions                                                                      |            |       |
| <b>2.2 - Formulating research question</b> | 10 pts | 2.2.1 - Formulating research question showing the relationship between 2 variables                                  |            |       |
|                                            |        | 2.2.2 - Clear & concise research question                                                                           |            |       |
| <b>2.3 - Formulate a Hypothesis</b>        | 10 pts | 2.3.1 - Formulating hypothesis related to research question                                                         |            |       |
|                                            |        | 2.3.2 - Basing the hypothesis on scientific and relevant information (including microscopic and chemical equations) |            |       |
| <b>2.4 - Experiment</b>                    |        | 2.4.1 - Plan experiment based on research question & checks the hypothesis                                          |            |       |

<sup>1</sup> <https://edu.gov.il/mazhap/chemistry/research-laboratory/Pages/research-evaluation.aspx>  
Israeli Ministry of Education, Pedagogical Administration, Science Department A, Chemistry Education Supervision. Last update: August 2018

|      |        |                                                                                                                 |  |  |  |
|------|--------|-----------------------------------------------------------------------------------------------------------------|--|--|--|
| plan | 15 pts |                                                                                                                 |  |  |  |
|      |        | 2.4.2 - State the type of experiment control and explain why                                                    |  |  |  |
|      |        | 2.4.3 - State the fixed variables in the experiment                                                             |  |  |  |
|      |        | 2.4.4 - Detailed & logical outline of the experiment process steps (including measuring the dependent variable) |  |  |  |
|      |        | 2.4.5 - Plan multiple experiment sets which allow reliable analysis of results                                  |  |  |  |
|      |        | 2.4.6 - Provide detailed list of materials (stating volumes, weights, concentrations, etc.) and tools needed    |  |  |  |

### Section 3: Experiment Execution (50 points):

| Dimension                          | Max    | Criteria                                                                                                                | Assessment | Score |
|------------------------------------|--------|-------------------------------------------------------------------------------------------------------------------------|------------|-------|
| 3.1 - Experiment Handling          | 5 pts  | 3.1.1 - Using lab tools safely                                                                                          |            |       |
|                                    |        | 3.1.2 - Work in an organized and clean fashion                                                                          |            |       |
| 3.2 - Results display and analysis | 15 pts | 3.2.1 - Clearly organize and display results in a table format                                                          |            |       |
|                                    |        | 3.2.2 - Process and display results using a graph (Excel)                                                               |            |       |
|                                    |        | 3.2.3 - Describe the trends revealed                                                                                    |            |       |
|                                    |        | 3.2.4 - Explain the results based on relevant and scientific information (including microscopic and chemical equations) |            |       |
| 3.3 - Draw conclusions             | 10 pts | 3.3.1 - Draw conclusions that fit the experiment results                                                                |            |       |
|                                    |        | 3.3.2 - Explain whether conclusions support the hypothesis                                                              |            |       |
| 3.4 - Summarized discussion        | 10 pts | 3.4.1 - Critically analyze the results (refer to results accuracy and experiment limitation)                            |            |       |
|                                    |        | 3.4.2 - Critically consider the validity of the conclusions                                                             |            |       |
|                                    |        | 3.4.3 - Based on the experiment results, formulate 3 new research questions                                             |            |       |
| 3.5 - Overall lab report           | 10 pts | 3.5.1 - Using concise and scientific language                                                                           |            |       |
|                                    |        | 3.5.2 - Writing clearly in standard language                                                                            |            |       |
|                                    |        | 3.5.3 - Submit complete, readable, organized, and aesthetic report                                                      |            |       |

#### Experiment's summarized assessment:

| Section 1 | Section 2 | Section 3 | Overall score | Teacher's signature |
|-----------|-----------|-----------|---------------|---------------------|
|           |           |           |               |                     |

**Comments:**

---

---
